# Supplementary material for: Mapping Insertions, Deletions and SNPs on Venter's Chromosomes
Source: PubMed Central journal article supplement (PMC2696090; doi:10.1371/journal.pone.0005972), 2009-06-22

Suppl. Fig. S3A

Chromosome 22

Insertions 10 -100 bp

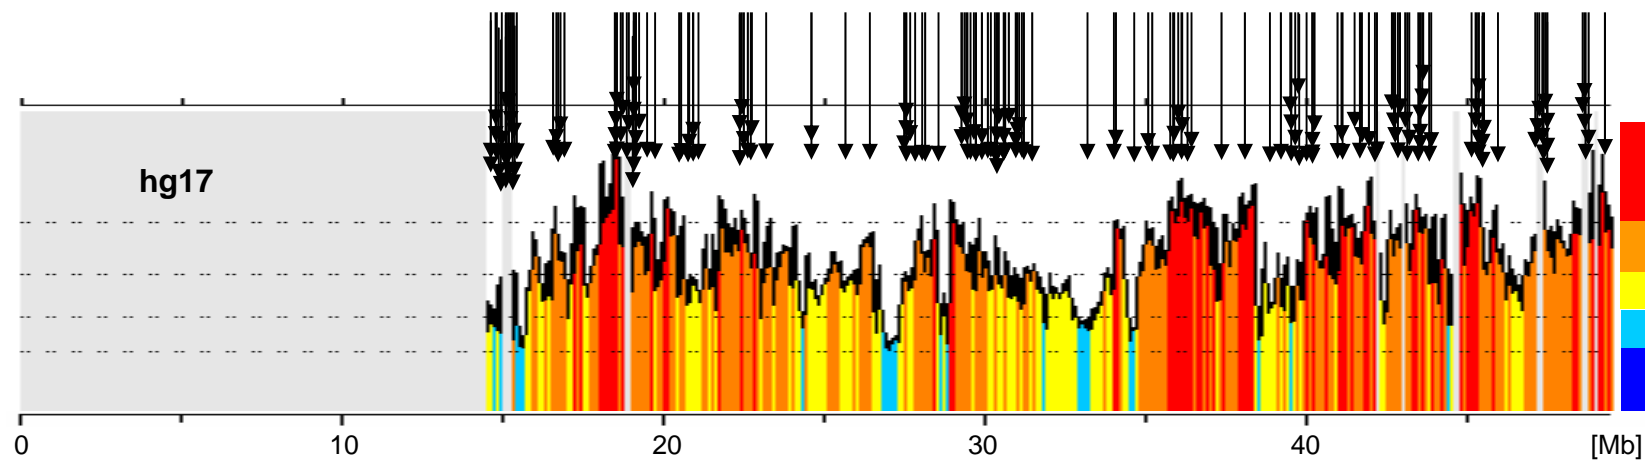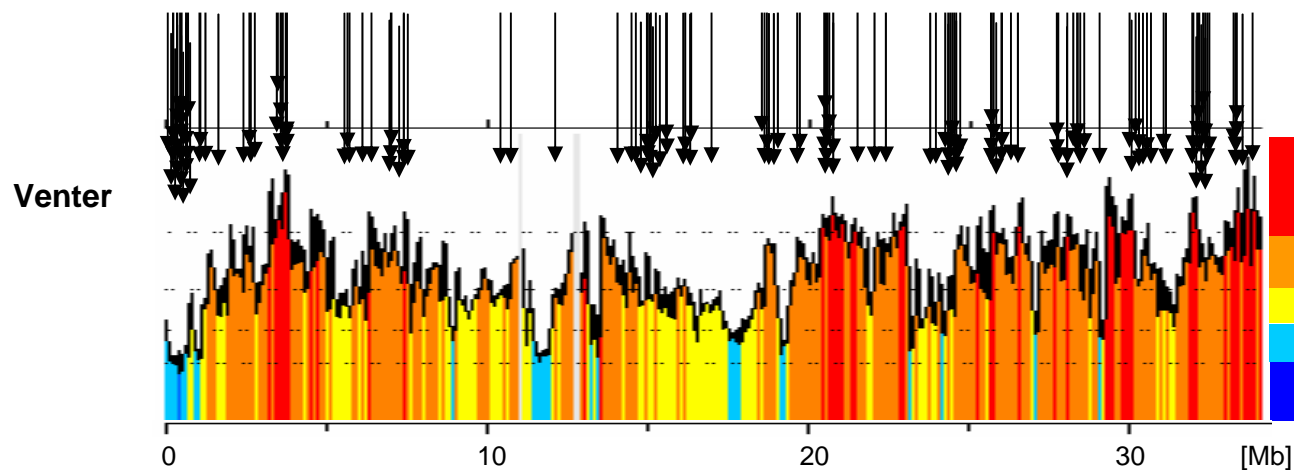

Suppl. Fig. S3B

Chromosome 22

Insertions 100 -1000 bp

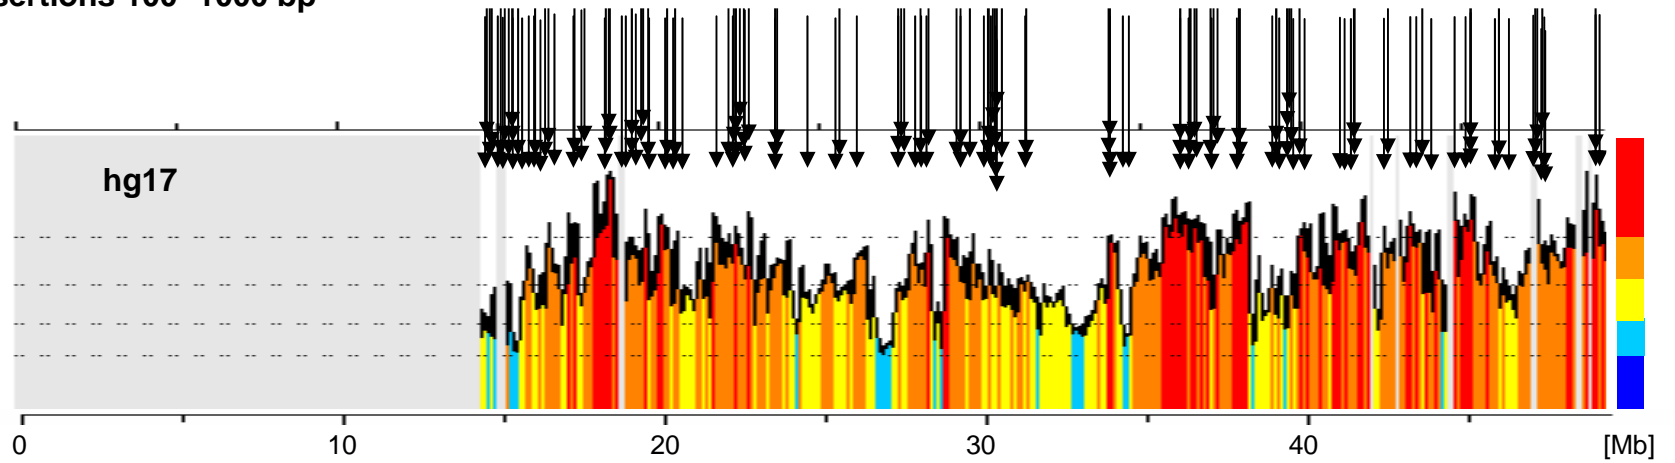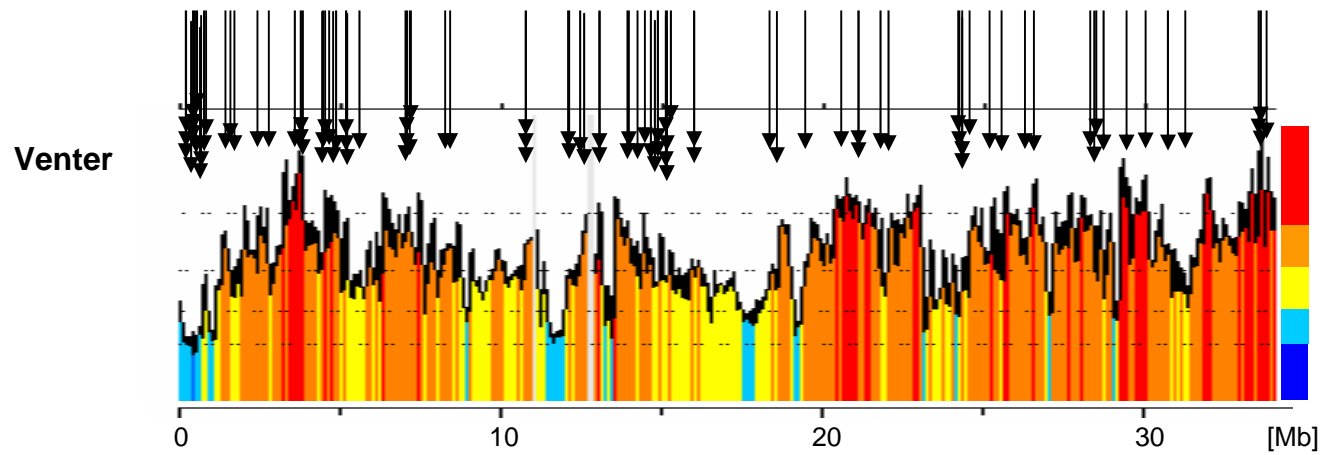

Supplement: pone.0005972.s003.pdf [file pone.0005972.s003.pdf]
