# Supplementary material for: Mapping Insertions, Deletions and SNPs on Venter's Chromosomes
Source: PLoS One. 2009 Jun 22;4(6):e5972. doi: 10.1371/journal.pone.0005972 (PMC2696090; doi:10.1371/journal.pone.0005972)
Supplement: Table S2 — (0.02 MB XLS) [file pone.0005972.s007.xls]

## Sheet: Sheet1
Supplementary Table S2. The sizes of the isochore families in megabases (Mb) and the number
		of SNPs for the chromosomes 17 to 22 in Venter and in hg17 are reported.
		Values in bold are the densities calculated as number of SNPs per megabases
		of DNA.
		Venter				hg17
	Size, Mb	SNPs			Size, Mb	SNPs
Chr17
L1	3	2392			3.3	2557
L2	13.5	14436			12.5	10449
H1	26.3	30132			29.6	33089
H2	28.2	31290			24.3	26927
H3	5.6	6607			7.7	8830
Total	76.6	84857	1107.79		77.4	81852	1057.52
Chr18
L1	20.8	21090			18.3	18808
L2	28.1	28170			28.2	27698
H1	22	25819			23.8	27578
H2	3.8	4262			3.8	4218
H3
	74.7	79341	1062.13		74.1	78302	1056.71
Total
Chr19
L1
L2	4.3	12258			3.2	7385
H1	16.2	21990			17.8	24728
H2	26	32344			24.9	31096
H3	9	11629			9.5	11878
Total	55.5	78221	1409.39		55.4	75087	1355.36
Chr20
L1
L2	15.5	17408			15.4	16877
H1	23.2	21773			23.2	20561
H2	17.3	17184			16.6	16693
H3	2.4	2778			3.1	3681
Total	58.4	59143	1012.72		58.3	57812	991.63
Chr21
L1	11.9	13877			11.25	13785
L2	7.7	10118			7.45	7255
H1	9.2	8763			8.7	8203
H2	2.7	3503			4.7	5580
H3	2	2492			1.4	1830
Total	33.5	38753	1156.81		33.5	36653	1094.12
Chr22
L1
L2	3.1	6214			1.1	1427
H1	8.5	8419			9.4	9830
H2	19.1	22253			19.7	21859
H3	3.5	3886			4.2	4385
Total	34.2	40772	1192.16		34.4	37501	1090.15
