# Supplementary material for: Mapping Insertions, Deletions and SNPs on Venter's Chromosomes
Source: PLoS One. 2009 Jun 22;4(6):e5972. doi: 10.1371/journal.pone.0005972 (PMC2696090; doi:10.1371/journal.pone.0005972)
Supplement: Table S3 — (0.02 MB XLS) [file pone.0005972.s008.xls]

## Sheet: Sheet1
Supplementary Table S3. The coordinates, GC levels and size are reported for isochores
		that represent high SNPs densities.
Chr	Band	Start	End	Size (Mb)	GC, %
17	q12a	27	27.4	0.4	44.3743
17	q23.2m	57.5	58	0.2	42.7368
18	p11.21e	13.9	14.5	0.6	42.2342
18	p11.21f	14.5	15.4	0.9	38.3281
19	p12l	24.1	24.5	0.4	38.1268
20	p11.21c	25.5	26.3	0.8	40.9994
21	q11.2a	13.4	13.9	0.5	37.311
21	q22.3f	44.8	45.1	0.3	49.649
21	q22.3m	46.1	46.4	0.3	54.4507
22	q12.2a	27.4	27.7	0.3	45.0927
22	q13.31b	41	41.5	0.5	52.9776
22	q13.33b	47.2	47.4	0.2	57.2856
22	q13.33c	47.4	48.3	0.9	49.9747
